# Supplementary material for: Interaction between Myricetin Aggregates and Lipase under Simplified Intestinal Conditions
Source: MDPI journal article supplement (doi:10.3390/foods9060777), 2020-06-11
Supplement: s1 [file s1]

## Supplementary information

### 1. Raw turbidity results over two hours of incubation

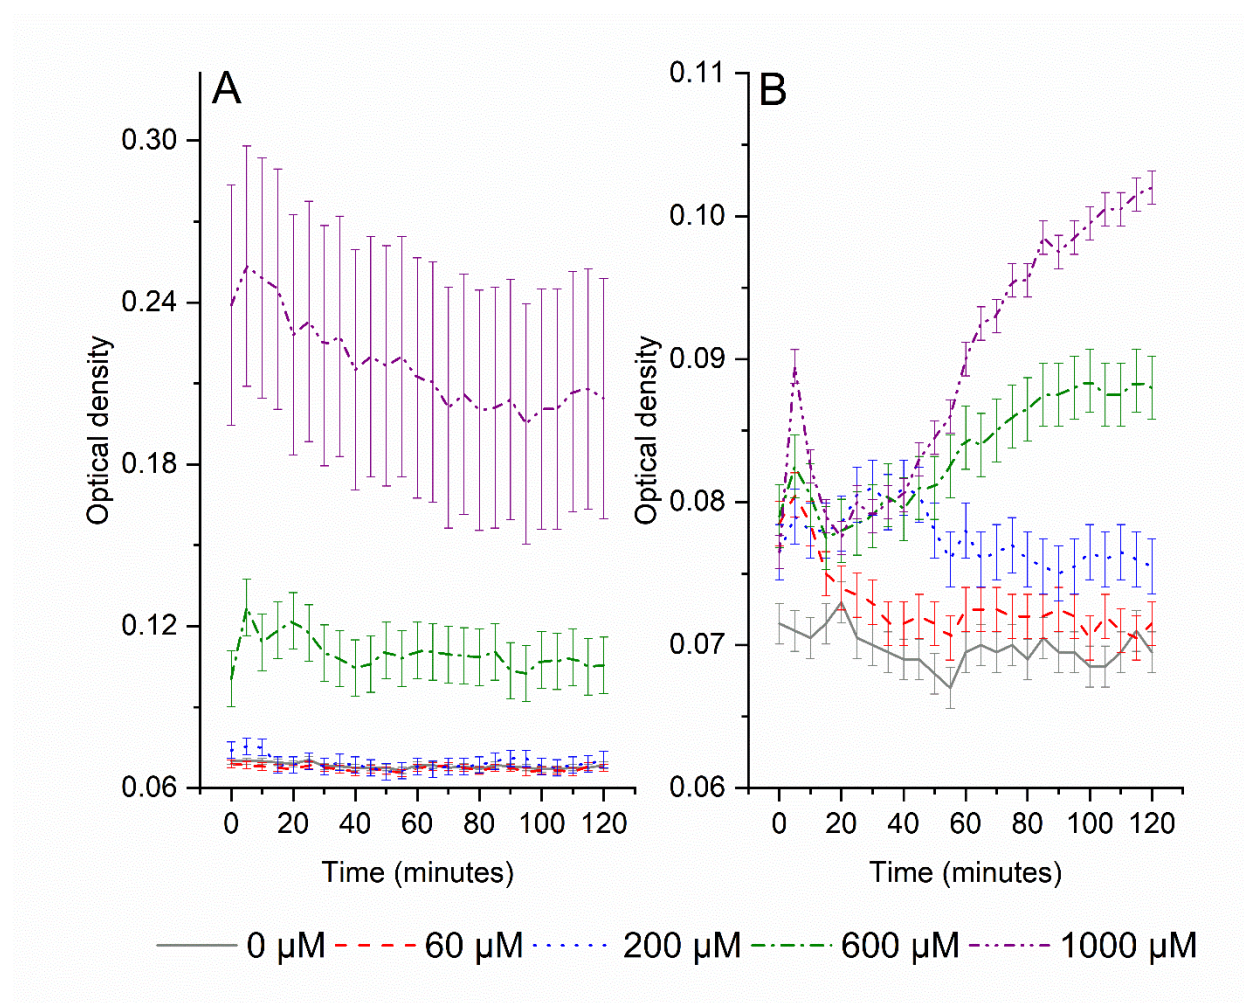

**Figure S1.** Aggregation kinetics of myricetin under different conditions for 5 different concentrations. (A) Myricetin—water samples, (B) Myricetin—intestinal solution samples. The error bars represent the pooled standard deviation from duplicates.

## 2. Molecular mass calculation from AF4

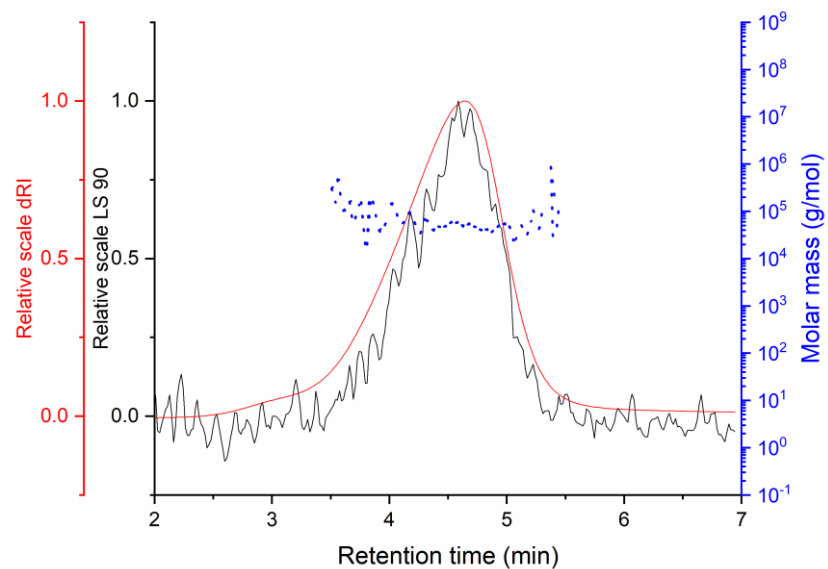

**Figure S2.** AF4-MALS-dRI fractograms. Average molar mass 50 kDa. See section *AF4 data processing* for more information.

## 3. Molecular dynamic simulations

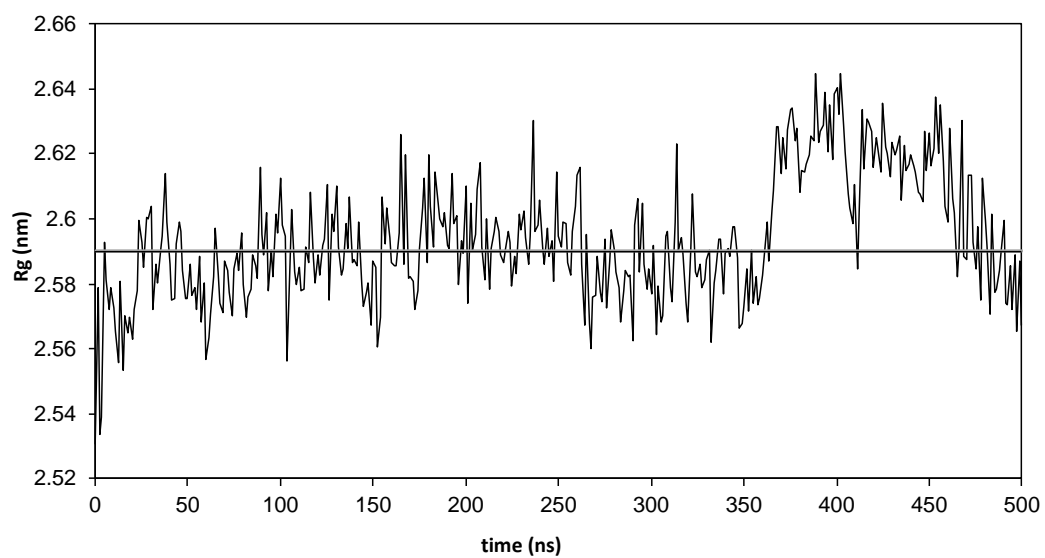

**Figure S3.** Radius of gyration obtained in MD analysis for the porcine lipase.
